# Supplementary material
Source: PubMed Central journal article supplement (PMC3732175)
Supplement: NIHMS416832-supplement-supplement-fig_3.pdf [file NIHMS416832-supplement-supplement-fig_3.pdf]

Supplementary Fig. 3a

anti-acetylated tubulin

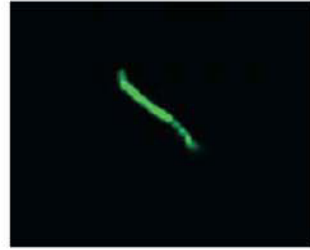

anti-beta-tubulin

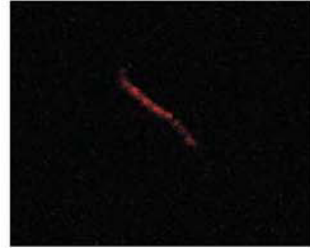

merge

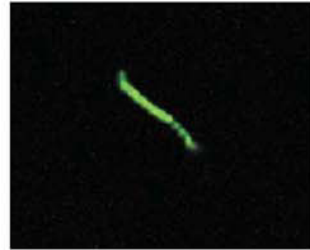

Supplementary Fig. 3b

anti-acetylated tubulin

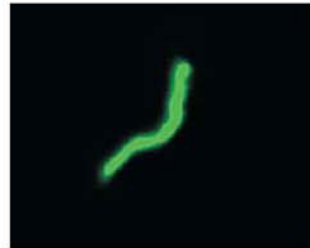

anti-INV (pAB, rabbit)

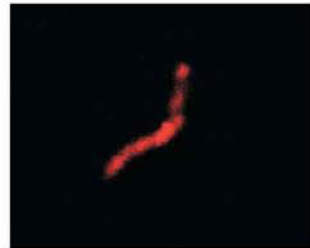

merge

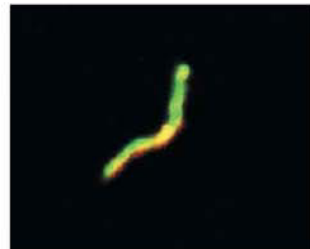

**Supplementary Fig. 3 A**, Costaining of anti-acetylated tubulin antibody and anti-beta tubulin 4 antibody in primary cilia of MDCK cell. **B**, Costaining of anti-acetylated tubulin antibody and anti-inversin antibody to primary cilia of MDCK cell.
